# Supplementary material
Source: PubMed Central journal article supplement (PMC10516528)
Supplement: NIHMS1886128-supplement-supinfo.pdf [file NIHMS1886128-supplement-supinfo.pdf]

## Supporting Information

### **Biodegradable Polyester Nanoparticle Vaccines Deliver Self-Amplifying mRNA in Mice at Low Doses**

#### **Authors**

David R. Wilson<sup>†</sup>, Stephany Y. Tzeng<sup>†</sup>, Yuan Rui<sup>†</sup>, Sarah Y. Neshat<sup>†</sup>, Marranne J Conge, Kathryn M. Luly, Ellen Wang, Jessica L. Firestone, Josie McAuliffe, Giulietta Maruggi, Rashmi Jalah, Russell Johnson, Joshua C. Doloff, Jordan J. Green\*

#### **Affiliations**

Dr. D. R. Wilson, Dr. S. Y. Tzeng, Dr. Y. Rui, S. Y. Neshat, M. J. Conge, K. M. Luly, E. Wang, Dr. J. C. Doloff, Prof J. J. Green

Department of Biomedical Engineering, Institute for NanoBioTechnology, and the Translational Tissue Engineering Center

Johns Hopkins University School of Medicine

Baltimore, MD 21231, USA

Email: Green@jhu.edu

Dr. J. L. Firestone, Dr. J. McAuliffe, Dr. G. Maruggi, Dr. R. Jalah, Dr. R. Johnson

GSK Vaccines

Rockville, MD 20850, USA

Prof. J. J. Green

Departments of Chemical & Biomolecular Engineering, Materials Science & Engineering, Neurosurgery, Oncology, and Ophthalmology

Sidney Kimmel Comprehensive Cancer Center and Bloomberg~Kimmel Institute for Cancer Immunotherapy

Johns Hopkins University

Baltimore, MD 21231, USA

<sup>†</sup> These authors contributed equally

**Figure S1.** PBAE Synthesis

**Figure S2.** Inclusion of PEG-lipid does not improve transfection *in vitro*

**Figure S3.** Supporting data for *in vitro* screening of PBAE polymers

**Figure S4.** Alkyl-side chain hydrophobicity influence on *in vitro* transfection of SAM to differentiated C2C12 myoblasts

**Figure S5.** Selection of murine intramuscular dose and timepoint for luminescence measurements.

**Table S1.** Monomers used for PBAE Synthesis

**Table S2.** PBAE synthesis conditions

**Table S3.** PBAE characterization properties assessed by gel permeation chromatography

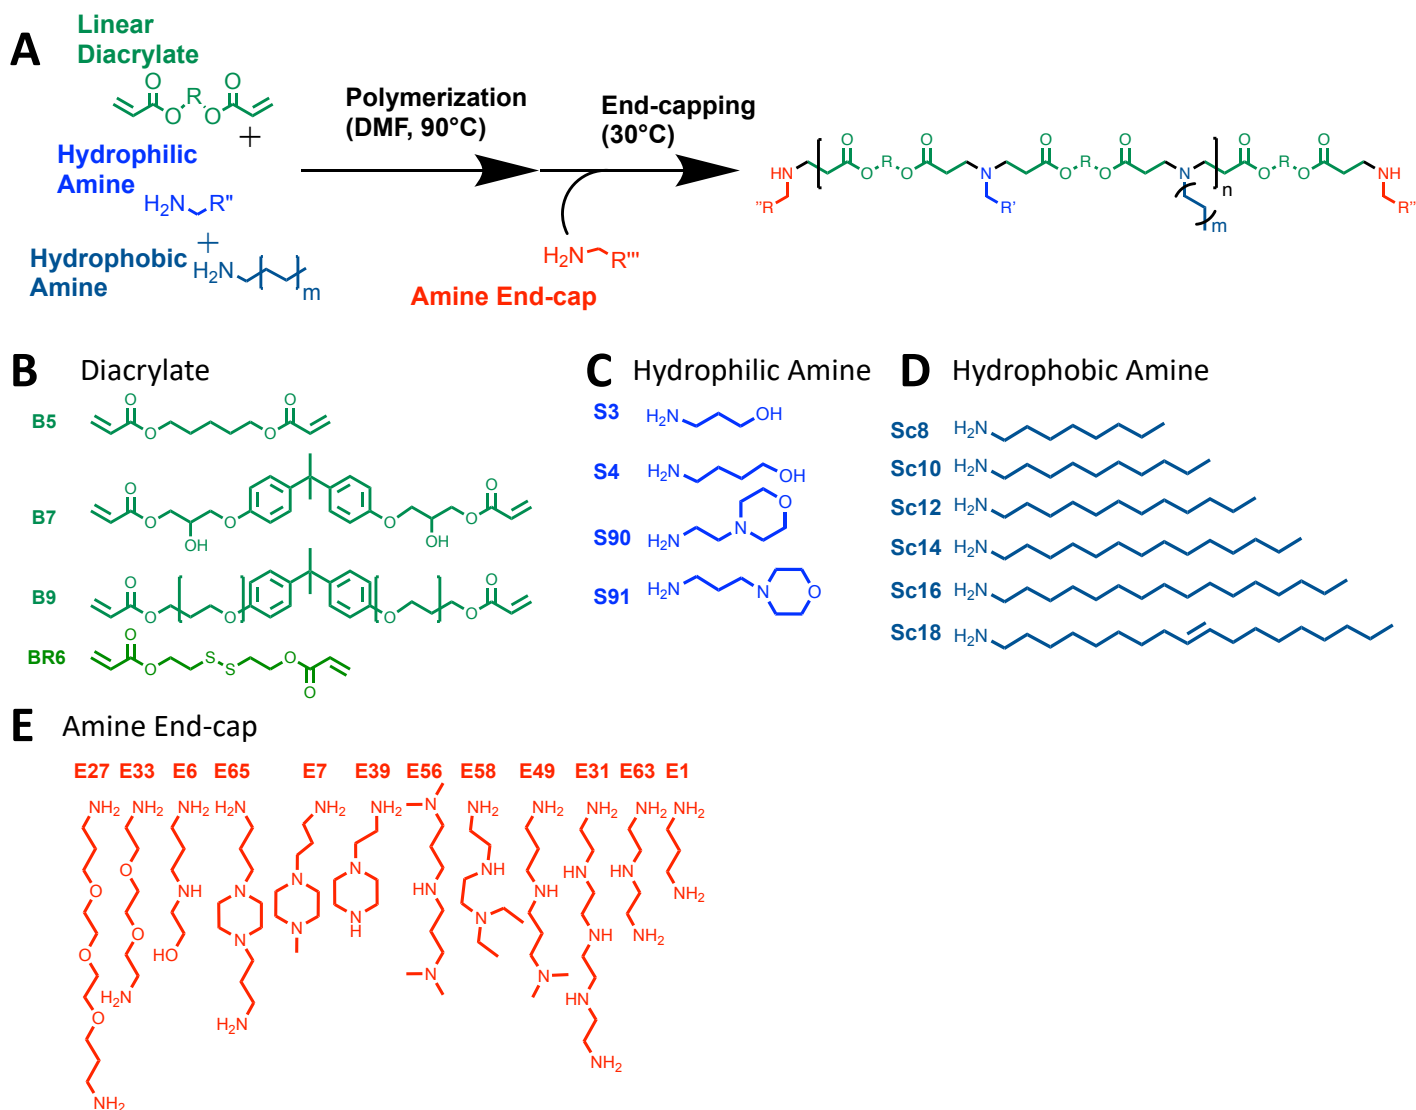

**Figure S1. PBAE Synthesis.** (A) Generalized synthesis of PBAEs in DMF followed by polymer end-capping with small molecule amine endcaps to yield linear, amphiphilic PBAEs. (B) Selected diacrylate monomers. (C) Selected hydrophilic amine monomers. (D) Selected hydrophobic amine monomers. (E) Selected amine end-cap monomers used in synthesis of the presented PBAEs.

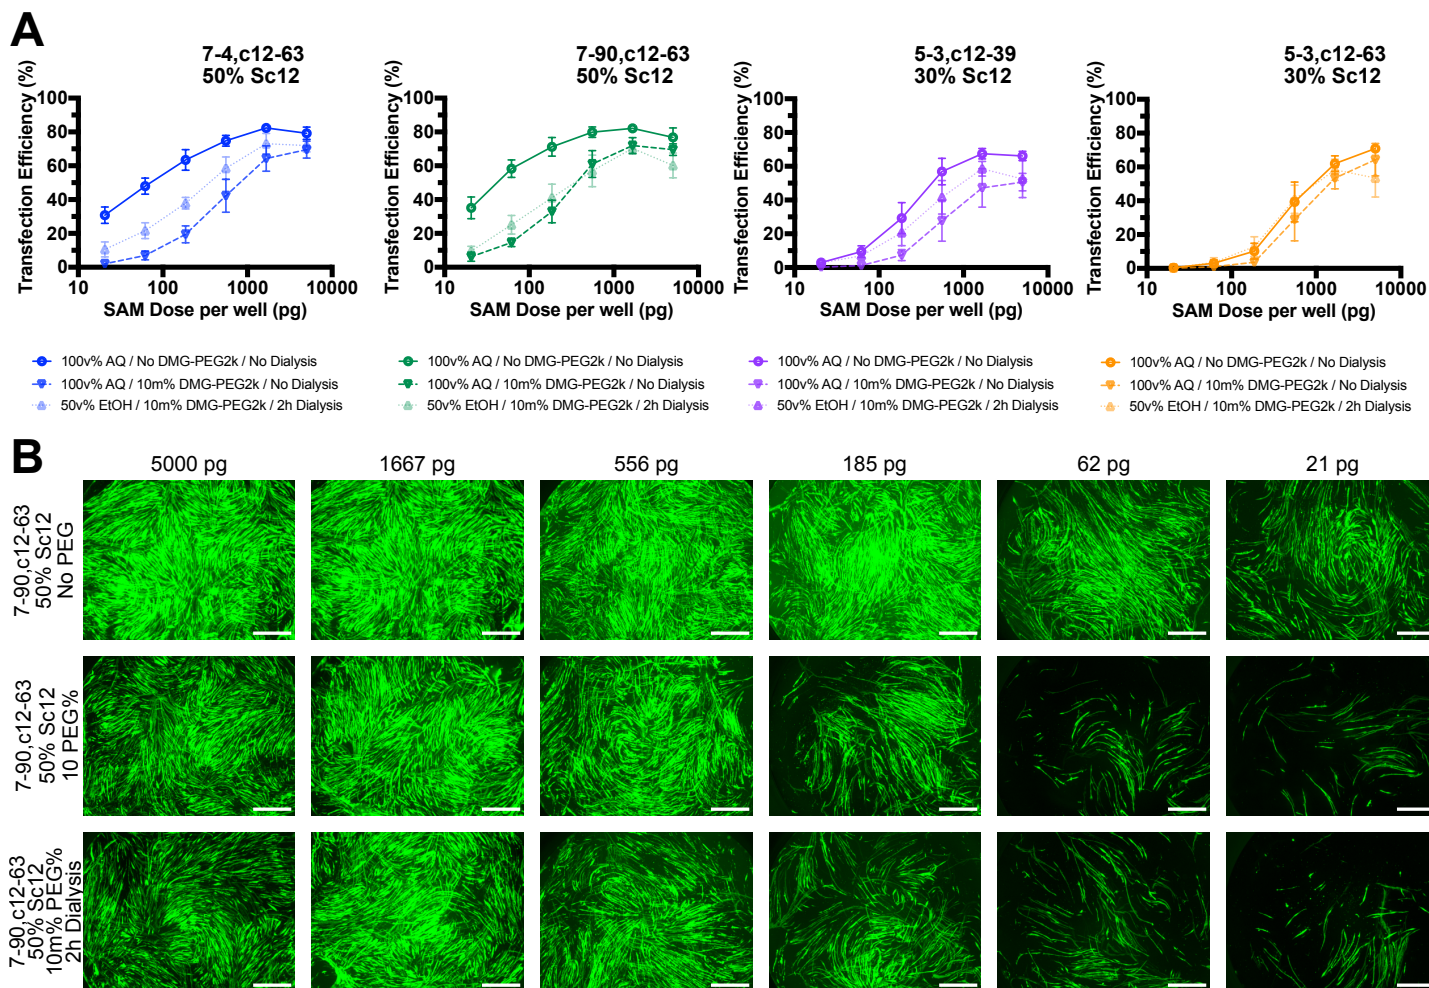

**Figure S2. Inclusion of PEG-lipid does not improve transfection *in vitro*.** **(A)** Transfection efficiency of SAM nanoparticles encoding eGFP added to confluent monolayers of C2C12 cells with SAM nanoparticles encoding eGFP formed under three different conditions. Solid lines show results for NPs prepared in 100v% aqueous MgAc<sub>2</sub> buffer with no DMG-PEG2k. Dashed lines show NPs prepared in 100v% aqueous MgAc<sub>2</sub> buffer with 10m% DMG-PEG2k. Dotted lines show NPs prepared in 50v% aqueous MgAc<sub>2</sub> buffer and 50v% EtOH with 10m% DMG-PEG2k followed by dialysis for 75 minutes into 150 mM PBS, pH 7.4. Inclusion of DMG-PEG2k reduced transfection efficiency *in vitro*, which was partially rescued in some formulations by dialysis. Points show  $\pm$  SD of four wells of a 96 well plate. **(B)** Representative microscope images of transfected wells of C2C12 myoblasts showing reduction in efficiency of transfection of PEGylated formulations for polymer 7-4,c12-63, 50% Sc12 *in vitro* at doses below 185 pg per well. Scale bars indicate 1  $\mu$ m.

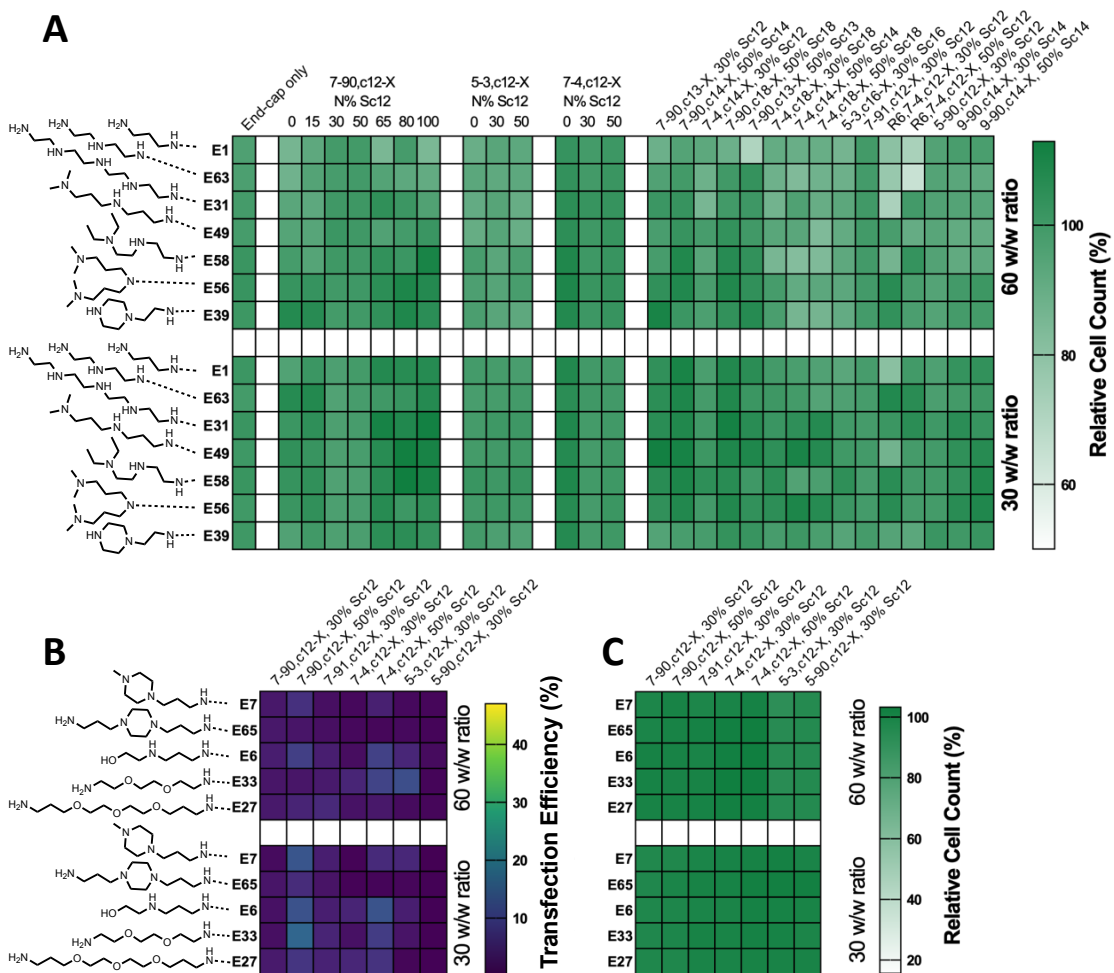

**Figure S3. Supporting data for *in vitro* screening of PBAE polymers. (A)** *In vitro* transfection relative cell viability assessed by nuclei counting normalized to untreated wells. Each well represents the mean of two wells of a 384-well plate. **(B)** Additional minimally effective polymers screened for SAM delivery in 384-well plates for transfection efficiency using eGFP SAM at a dose of 1 ng/well relative to untreated cells and **(C)** Cellular viability of these polymers as assessed by nuclei counting relative to untreated cells.

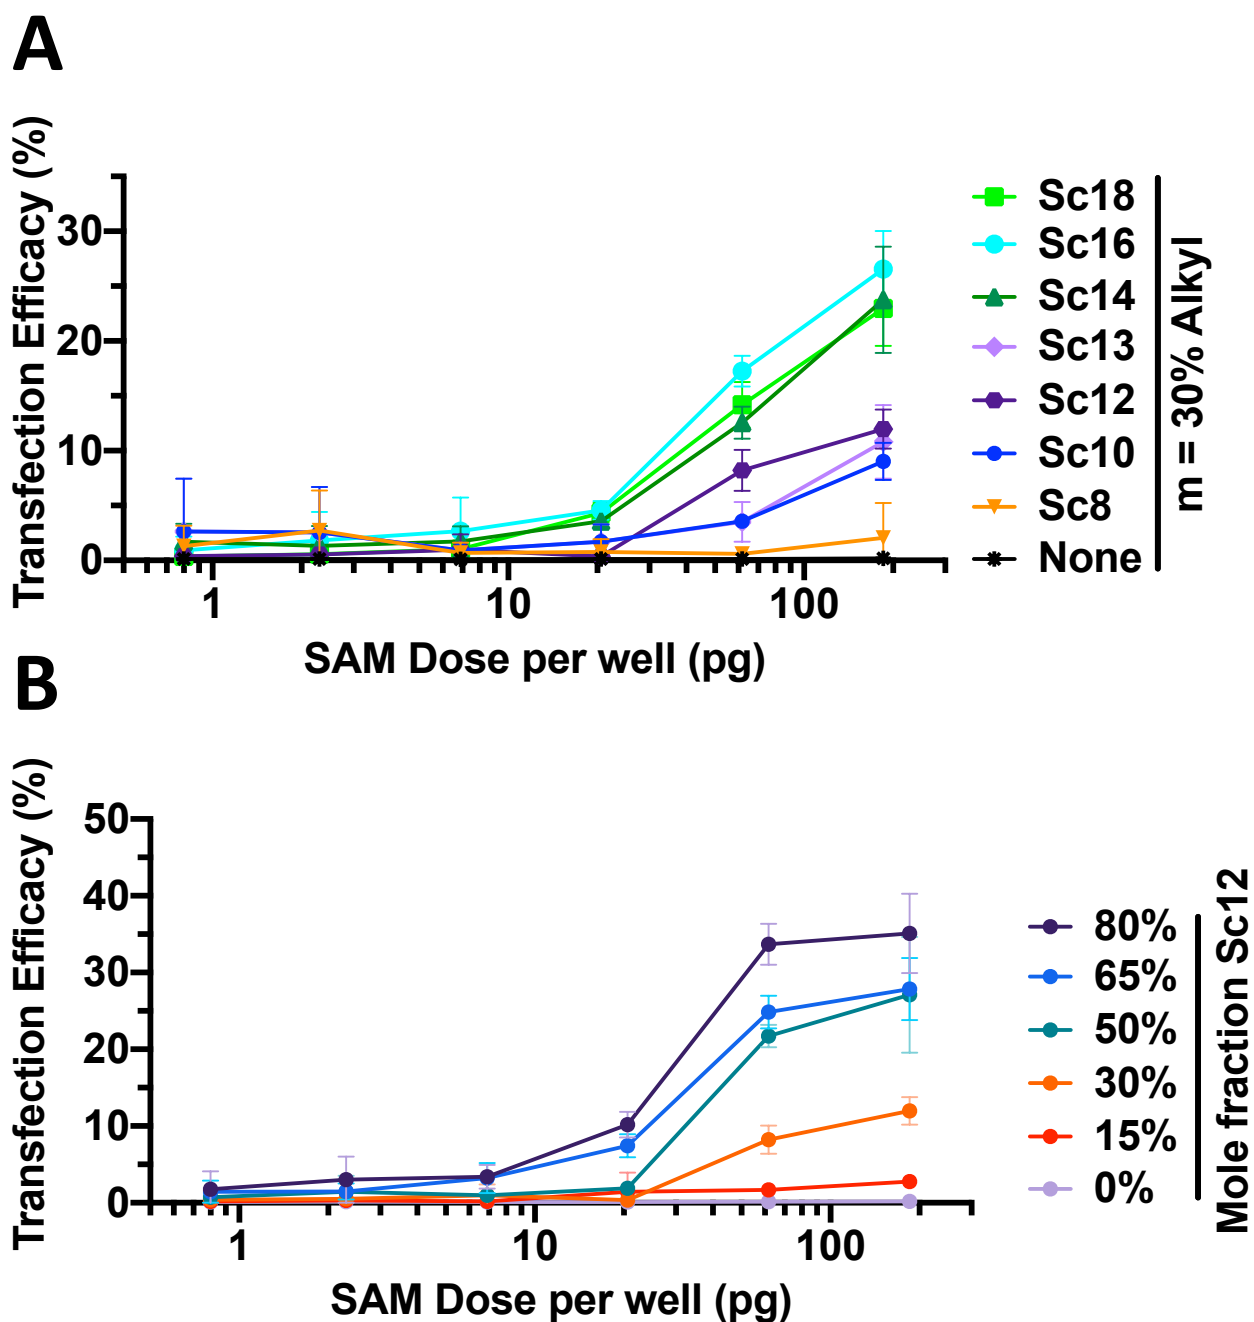

**Figure S4. Alkyl-side chain hydrophobicity influence on *in vitro* transfection of SAM to differentiated C2C12 myoblasts.** Experiments were performed using polymer 7-90, Sc<sub>n</sub>-63 with alkyl side-chains of length *n* and *m*% mole fraction alkyl side-chain monomer. All nanoparticles were prepared with GFP SAM at 30 w/w ratio without DMG-PEG2k. **(A)** Increasing the alkyl-amine side-chain length while maintaining mole fraction of alkyl side-chain at 30% demonstrated that more hydrophobic alkyl-side chains increased efficacy of transfection *in vitro*. **(B)** Increasing the alkyl-amine side-chain mole fraction while keeping the alkyl length constant at 12 carbons similarly increased transfection *in vitro*.

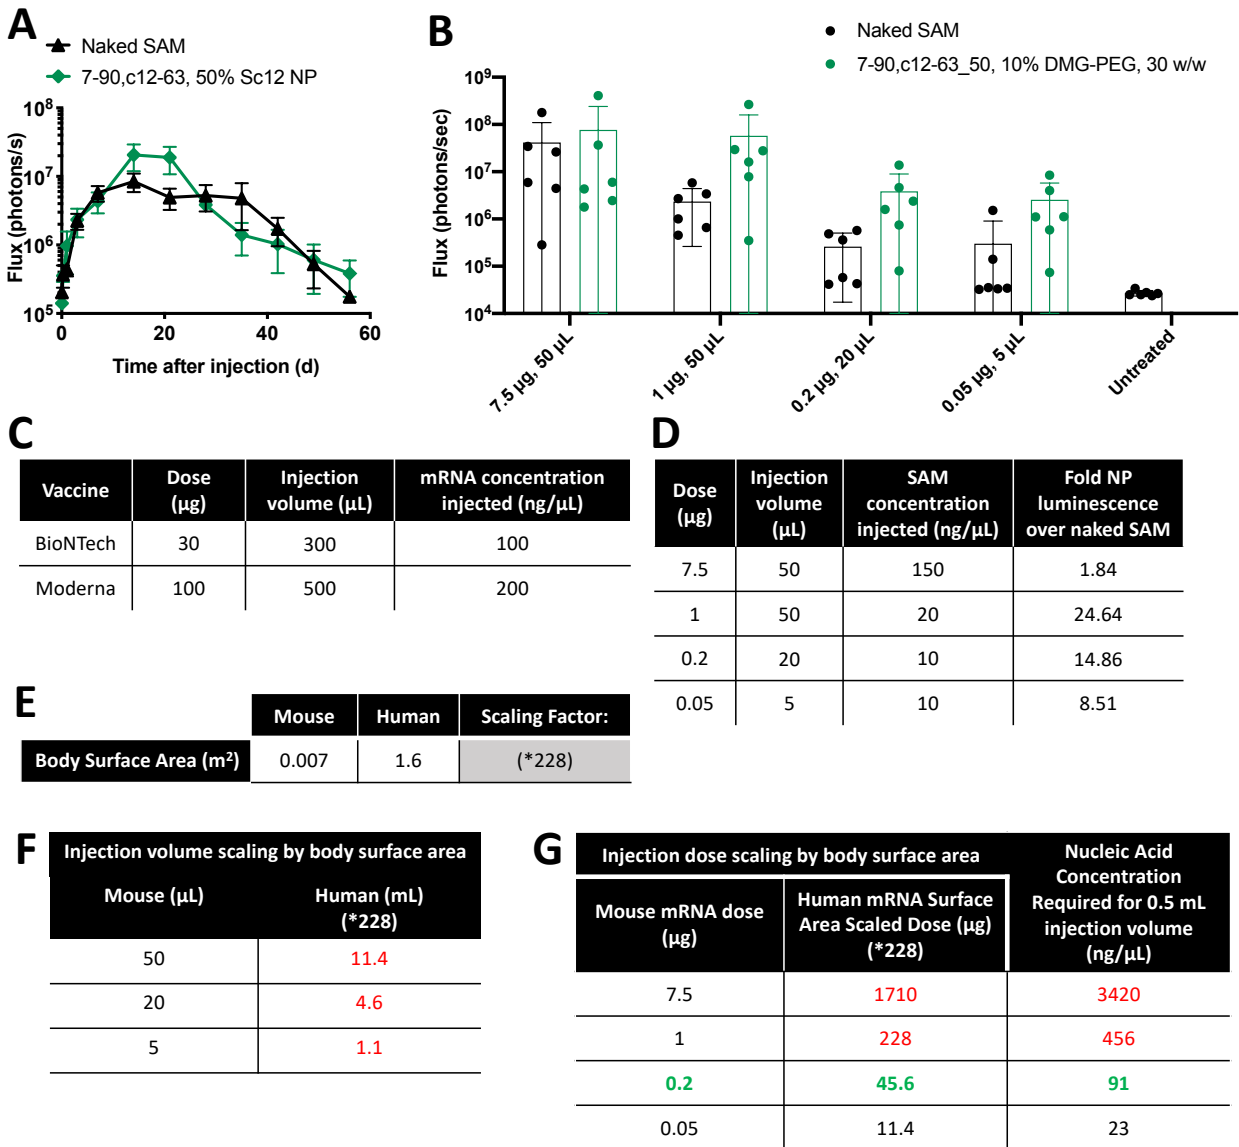

**Figure S5. Selection of murine intramuscular dose and timepoint for luminescence measurements. (A)** Identification of peak expression of SAM following intramuscular injection between 10-21 days with a dose of 2  $\mu\text{g}$  of SAM packaged in 7-90,c12-63, 50% Sc12 nanoparticles formulated with 10 mass% DMG-PEG2k. **(B)** Intramuscular injection volume and dose titration in mice of naked SAM and PBAE nanoparticles. **(C)** Injection doses and volumes used for SARS-CoV-2 mRNA vaccines used clinically. **(D)** Injection dose, volume, SAM concentration and fold luminescence over naked SAM achieved using PBAE nanoparticles. **(E)** Body surface area scaling between mice and adult humans results in a scaling factor of 228 using a lower end body surface area of 1.6  $\text{m}^2$  for an adult human female. Using a surface area of 1.9  $\text{m}^2$  for an adult human male would result in a higher scaling factor. **(F)** Scaling intramuscular injection volumes by body surface area results in injection volumes greater than acceptable for human intramuscular injection volumes (red), where 0.5 mL is considered a maximum acceptable injection volume. **(G)** Calculations for scaling intramuscular mRNA doses from those evaluated in mice (0.05  $\mu\text{g}$  to 7.5  $\mu\text{g}$ ) to an equivalent surface area scaled dose for administration in humans. Given the dosage constraints, a 0.2  $\mu\text{g}$  dose (green) was selected for evaluation of intramuscular administration in mice.

**Table S1.** Monomers used for PBAE Synthesis

|                                   | Chemical Name                                          | Supplier                                       | Cas Number  | Product Number |
|-----------------------------------|--------------------------------------------------------|------------------------------------------------|-------------|----------------|
| <b>Linear Diacrylate Monomers</b> |                                                        |                                                |             |                |
| <b>B5</b>                         | 1,5-Pentanediol diacrylate                             | Bajae Labs                                     | 36840-85-4  | 9281           |
| <b>B7</b>                         | Bisphenol A glycerolate (1 glycerol/phenol) diacrylate | Sigma Aldrich                                  | 4687-94-9   | 411167         |
| <b>B9</b>                         | Bisphenol A ethoxylate (1.5 EO/phenol) diacrylate      | Sigma Aldrich                                  | 64401-02-1  | 413550         |
| <b>BR6</b>                        | 2,2-disulfanediylbis(ethane-2,1-diyl) diacrylate       | Synthesized according to Kozielski et al. 2013 | N/A         | N/A            |
| <b>Hydrophilic Amino Monomers</b> |                                                        |                                                |             |                |
| <b>S3</b>                         | 3-amino-1-propanol                                     | Alfa Aesar                                     | 156-87-6    | B23041         |
| <b>S4</b>                         | 4-amino-1-butanol                                      | Fisher Scientific                              | 13325-10-05 | AC176350050    |
| <b>S90</b>                        | 4-(2-Aminoethyl)morpholine                             | Sigma Aldrich                                  | 2038-031    | A55004         |
| <b>S91</b>                        | 3-Morpholinopropylamine                                | Sigma Aldrich                                  | 123-00-2    | A9028          |
| <b>Hydrophobic Amino Monomers</b> |                                                        |                                                |             |                |
| <b>Sc8</b>                        | Octylamine                                             | Sigma Aldrich                                  | 111-86-6    | O5802          |
| <b>Sc10</b>                       | 1-decylamine                                           | Sigma Aldrich                                  | 2016-57-1   | 30692          |
| <b>Sc12</b>                       | 1-dodecylamine                                         | Alfa Aesar                                     | 124-22-1    | A15515         |
| <b>Sc13</b>                       | Tridecylamine                                          | TCI America                                    | 2869-34-3   | A0762          |
| <b>Sc14</b>                       | Tetradecylamine                                        | Acros Organics                                 | 2016-42-4   | AC138100500    |
| <b>Sc16</b>                       | Hexadecylamine                                         | Acros Organics                                 | 143-27-1    | AC120510050    |
| <b>Sc18</b>                       | Oleylamine                                             | Sigma Aldrich                                  | 112-90-3    | O7805          |
| <b>End-cap Amino Monomers</b>     |                                                        |                                                |             |                |
| <b>E1</b>                         | 1,3-diaminopropane                                     | Sigma Aldrich                                  | 109-76-2    | D23602         |
| <b>E6</b>                         | 2-(3-Aminopropylamino)ethanol                          | Sigma Aldrich                                  | 4461-39-6   | 9293           |
| <b>E7</b>                         | 1-(3-Aminopropyl)-4-methylpiperazine                   | Alfa Aesar                                     | 4572-031    | L04876         |
| <b>E27</b>                        | 4,7,10-Trioxa-1,13-tridecanediamine                    | Sigma Aldrich                                  | 4246-51-9   | 369519         |
| <b>E31</b>                        | Tetraethylenepentamine                                 | Sigma Aldrich                                  | 1112-57-2   | T11509         |
| <b>E33</b>                        | 2,2'-(Ethylenedioxy)bis(ethylamine)                    | Sigma Aldrich                                  | 929-59-9    | 385506         |
| <b>E39</b>                        | 1-(2-Aminoethyl)piperazine                             | Sigma Aldrich                                  | 140-31-8    | A55209         |



|            |                                        |               |            |           |
|------------|----------------------------------------|---------------|------------|-----------|
| <b>E49</b> | N,N-Dimethyldipropylenetriamine        | Sigma Aldrich | 10563298   | 550019    |
| <b>E56</b> | 3,3'-Iminobis(N,N-dimethylpropylamine) | Santa Cruz    | 6711484    | SC-231967 |
| <b>E58</b> | N,N-Diethyldiethylenetriamine          | Sigma Aldrich | 24426-16-2 | 518832    |
| <b>E63</b> | Diethylenetriamine                     | Sigma Aldrich | 111-40-0   | 803274    |
| <b>E65</b> | 1,4-Bis(3-aminopropyl)piperazine       | TCI America   | 7209-38-3  | B1041     |

**Table S2.** PBAE synthesis conditions. All were synthesized at 90°C for 48 hours in DMF. Arranged to match Figure 2A.

| Base polymer Name | Overall Vinyl : Amine Monomer Ratio | Alkyl Side-chain Monomers | Bioreducible Monomers | Synthesis Conc (mg/mL) |
|-------------------|-------------------------------------|---------------------------|-----------------------|------------------------|
| 7-90-             | 2.173                               | 0                         | 0                     | 400                    |
| 7-90,c12-         | 2.3                                 | 15% Sc12                  | 0                     | 600                    |
| 7-90,c12-         | 2.3                                 | 30% Sc12                  | 0                     | 600                    |
| 7-90,c12-         | 2.3                                 | 50% Sc12                  | 0                     | 600                    |
| 7-90,c12-         | 2.3                                 | 65% Sc12                  | 0                     | 600                    |
| 7-90,c12-         | 2.3                                 | 80% Sc12                  | 0                     | 600                    |
| 7-90,c12-         | 2.4                                 | 100% Sc12                 | 0                     | 300                    |
|                   |                                     |                           |                       |                        |
| 5-3-              | 2.187                               | 0                         | 0                     | Neat                   |
| 5-3,c12-          | 2.1                                 | 30% Sc12                  | 0                     | 600                    |
| 5-3,c12-          | 2.1                                 | 50% Sc12                  | 0                     | 600                    |
| 5-3,c12-          | 2.1                                 | 50% Sc12                  | 0                     | 600                    |
|                   |                                     |                           |                       |                        |
| 7-4-              | 2.182                               | 0                         | 0                     | 400                    |
| 7-4,c12-          | 2.205                               | 30% Sc12                  | 0                     | 400                    |
| 7-4,c12-          | 2.235                               | 50% Sc12                  | 0                     | 400                    |
|                   |                                     |                           |                       |                        |
| 7-90,c13-         | 2.300                               | 30% Sc13                  | 0                     |                        |
| 7-90,c13-         | 2.3                                 | 50% Sc13                  | 0                     | 600                    |
| 7-90,c14-         | 2.4                                 | 50% Sc14                  | 0                     | 600                    |
| 7-90,c18-         | 2.3                                 | 50% Sc18                  | 0                     | 600                    |
| 5-3,c16-          | 2.1                                 | 30% Sc16                  | 0                     | 600                    |
| 7-4,c14-          | 2.3                                 | 30% Sc14                  | 0                     | 600                    |
| 7-4,c14-          | 2.3                                 | 50% Sc14                  | 0                     | 600                    |
| 7-4,c18-          | 2.3                                 | 30% Sc18                  | 0                     | 600                    |
| 7-4,c18-          | 2.3                                 | 50% Sc18                  | 0                     | 600                    |
| R6,7-4,c12-       | 2.040                               | 30% Sc12                  | 60% BR6               | 500                    |
| R6,7-4,c12-       | 2.040                               | 50% Sc12                  | 60% BR6               | 500                    |
| 7-91,c12-         | 2.400                               | 30% Sc12                  | 0                     | 400                    |
| 5-90,c12-         | 2.100                               | 30% Sc12                  | 0                     | 600                    |
| 9-90,c14-         | 2.4                                 | 30% Sc14                  | 0                     | 600                    |
| 9-90,c14-         | 2.4                                 | 50% Sc14                  | 0                     | 600                    |
|                   |                                     |                           |                       |                        |
| 7-90,c8-          | 2.3                                 | 30% Sc8                   | 0                     | 600                    |
| 7-90,c10-         | 2.3                                 | 30% Sc10                  | 0                     | 600                    |
| 7-90,c12-         | 2.3                                 | 30% Sc12                  | 0                     | 600                    |
| 7-90,c14-         | 2.3                                 | 30% Sc14                  | 0                     | 600                    |
| 7-90,c16-         | 2.3                                 | 30% Sc16                  | 0                     | 600                    |
| 7-90,c18-         | 2.3                                 | 30% Sc18                  | 0                     | 600                    |

**Table S3.** PBAE characterization properties assessed by gel permeation chromatography. Arranged to match Figure 2A.

| Base polymer Name | GPC MN (Da) | GPC MW (Da) | GPC MP (Da) | GPC PDI |
|-------------------|-------------|-------------|-------------|---------|
| 7-90-             | 7164        | 20896       | 8158        | 2.917   |
| 7-90,c12-         | 7473        | 12142       | 8637        | 1.620   |
| 7-90,c12-         | 7299        | 15946       | 7554        | 2.180   |
| 7-90,c12-         | 5880        | 17707       | 6394        | 3.012   |
| 7-90,c12-         | 5820        | 14530       | 7070        | 2.500   |
| 7-90,c12-         | 7217        | 17190       | 10092       | 2.380   |
| 7-90,c12-         | 5083        | 9148        | 6083        | 1.800   |
|                   |             |             |             |         |
| 5-3-              | 5316        | 15919       | 6394        | 2.994   |
| 5-3,c12-          | 5446        | 7425        | 6602        | 1.363   |
| 5-3,c12-          | 5168        | 6535        | 6404        | 1.264   |
| 5-3,c12-          | 7492        | 8253        | 7241        | 1.100   |
|                   |             |             |             |         |
| 7-4-              | 6851        | 21161       | 7520        | 3.089   |
| 7-4,c12-          | 4762        | 10408       | 5844        | 2.186   |
| 7-4,c12-          | 4291        | 9892        | 4920        | 2.305   |
|                   |             |             |             |         |
| 7-90,c13-         | 5746        | 13596       | 6259        | 2.366   |
| 7-90,c13-         | 9382        | 45293       | 227896      | 4.830   |
| 7-90,c14-         | 7493        | 33512       | 16646       | 4.472   |
| 7-90,c18-         | 5816        | 20701       | 6146        | 3.559   |
| 5-3,c16-          | 6741        | 7737        | 7006        | 1.150   |
| 7-4,c14-          | 5513        | 12770       | 6450        | 2.316   |
| 7-4,c14-          | 6589        | 34004       | 187514      | 5.161   |
| 7-4,c18-          | 5694        | 14412       | 6611        | 2.531   |
| 7-4,c18-          | 7516        | 35262       | 193540      | 4.691   |
| R6,7-4,c12-       | 4514        | 11360       | 5270        | 2.517   |
| R6,7-4,c12-       | 3348        | 4784        | 3809        | 1.429   |
| 7-91,c12-         | 6080        | 17560       | 7299        | 2.876   |
| 5-90,c12-         | 6009        | 6485        | 5983        | 1.079   |
| 9-90,c14-         | 4290        | 5263        | 5667        | 1.227   |
| 9-90,c14-         | 4414        | 5406        | 5818        | 1.225   |
|                   |             |             |             |         |
| <b>7-90,c8-</b>   | 4358        | 4993        | 4980        | 1.15    |
| <b>7-90,c10-</b>  | 9330        | 28457       | 16255       | 3.05    |
| <b>7-90,c12-</b>  | 7299        | 15946       | 7554        | 2.18    |
| <b>7-90,c14-</b>  | 7578        | 15557       | 7508        | 2.05    |
| <b>7-90,c16-</b>  | 8774        | 26958       | 14872       | 3.07    |
| <b>7-90,c18-</b>  | 8759        | 26516       | 15197       | 3.03    |
